# Supplementary material for: Selectivity and activity modulation of electrocatalytic carbon dioxide reduction by atomically dispersed dual iron catalysts
Source: Royal Society of Chemistry journal article supplement (doi:10.1039/d2ta08313b), 2023-01-01
Supplement: d2ta08313b1.pdf [file d2ta08313b1.pdf]

## Supporting Information

### Selectivity and Activity Modulation of Electrocatalytic Carbon Dioxide Reduction by Atomically Dispersed Dual Iron Catalyst

by

Kuan-Chieh Li,<sup>a</sup> Zong-Hua Wu,<sup>a</sup> Chun-Hung Ke,<sup>a</sup> Yao-Chang Lee,<sup>b</sup> Jyh-Fu Lee,<sup>b</sup> Jin-Ming Chen,<sup>b</sup> Shu-Chih Haw,<sup>b</sup> Fu-Te Tsai,<sup>a,\*</sup> Wen-Feng Liaw<sup>a,\*</sup>

<sup>a</sup>Department of Chemistry and Frontier Research Center of Fundamental and Applied Science of Matters, National Tsing Hua University, Hsinchu 30013, Taiwan

<sup>b</sup>National Synchrotron Radiation Research Center, Hsinchu, Taiwan

E-mail: [wfliaw@mx.nthu.edu.tw](mailto:wfliaw@mx.nthu.edu.tw); [ftsai@mx.nthu.edu.tw](mailto:ftsai@mx.nthu.edu.tw)

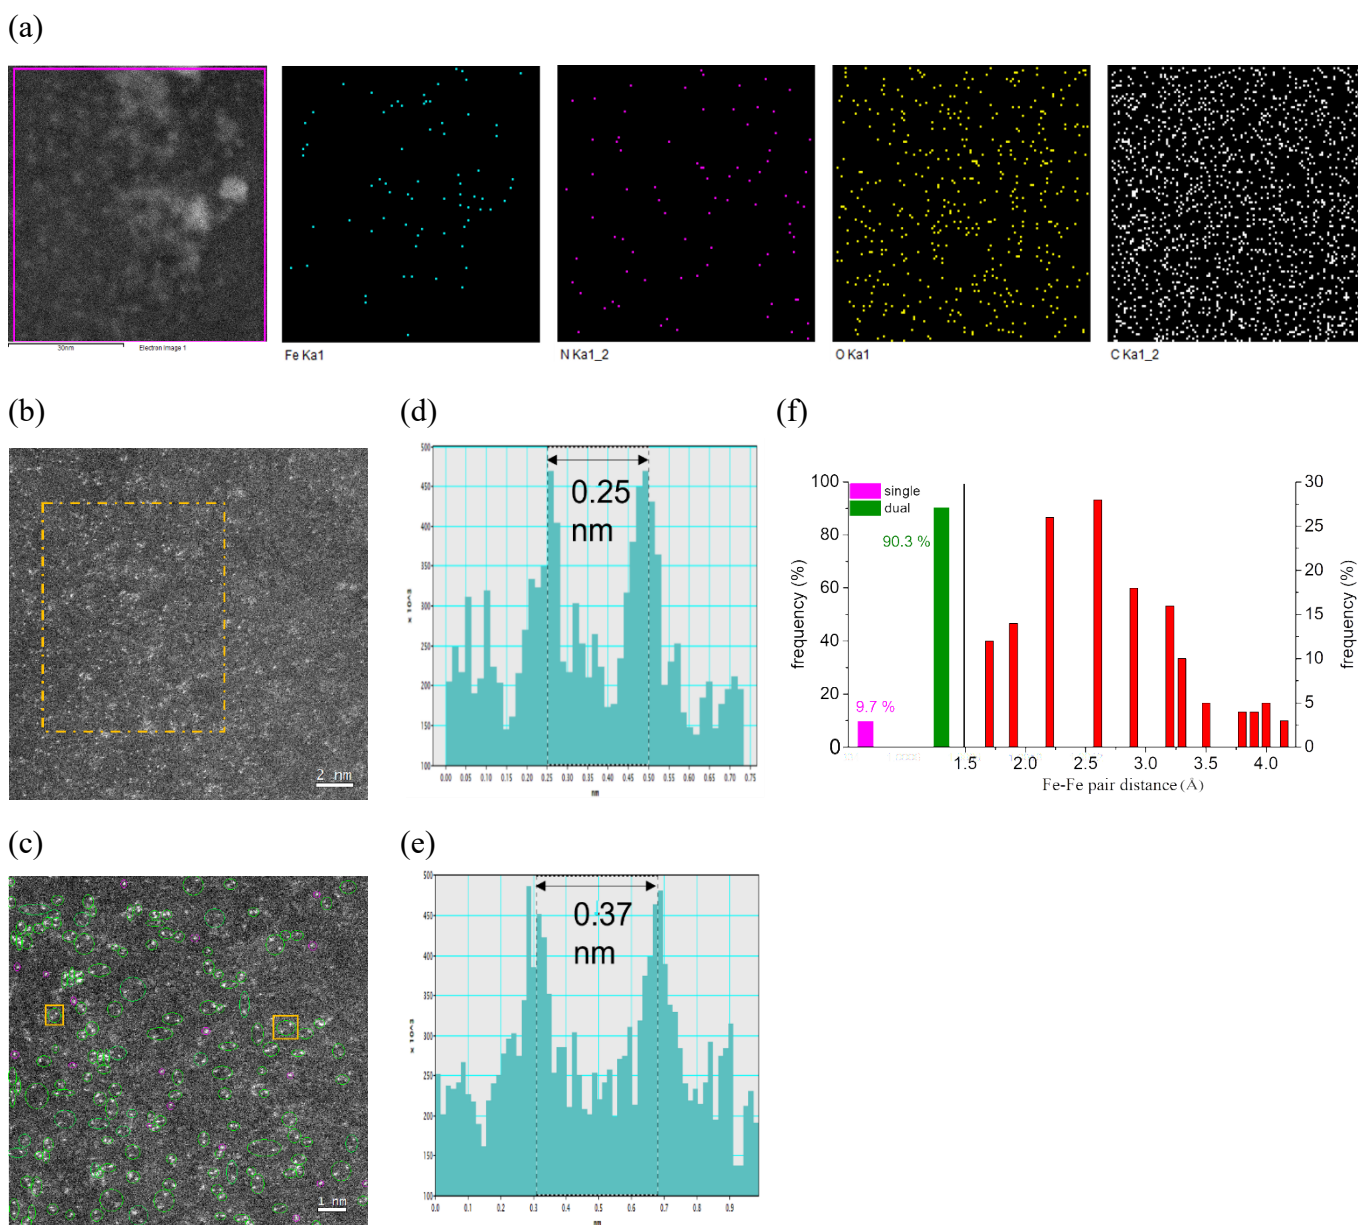

**Figure S1.** Microscopic characterization of Fe<sub>2</sub>/g-C<sub>3</sub>N<sub>4</sub> precursor. (a) HAADF-STEM image and corresponding EDX mappings. (b) AC-STEM image. (c) Magnified AC-STEM image. (d)-(e) Intensity profiles gained in the area of yellow squares shown in (c). (f) Statistical density of dual Fe<sub>2</sub> and single Fe sites and Fe-Fe pair distance in (c).

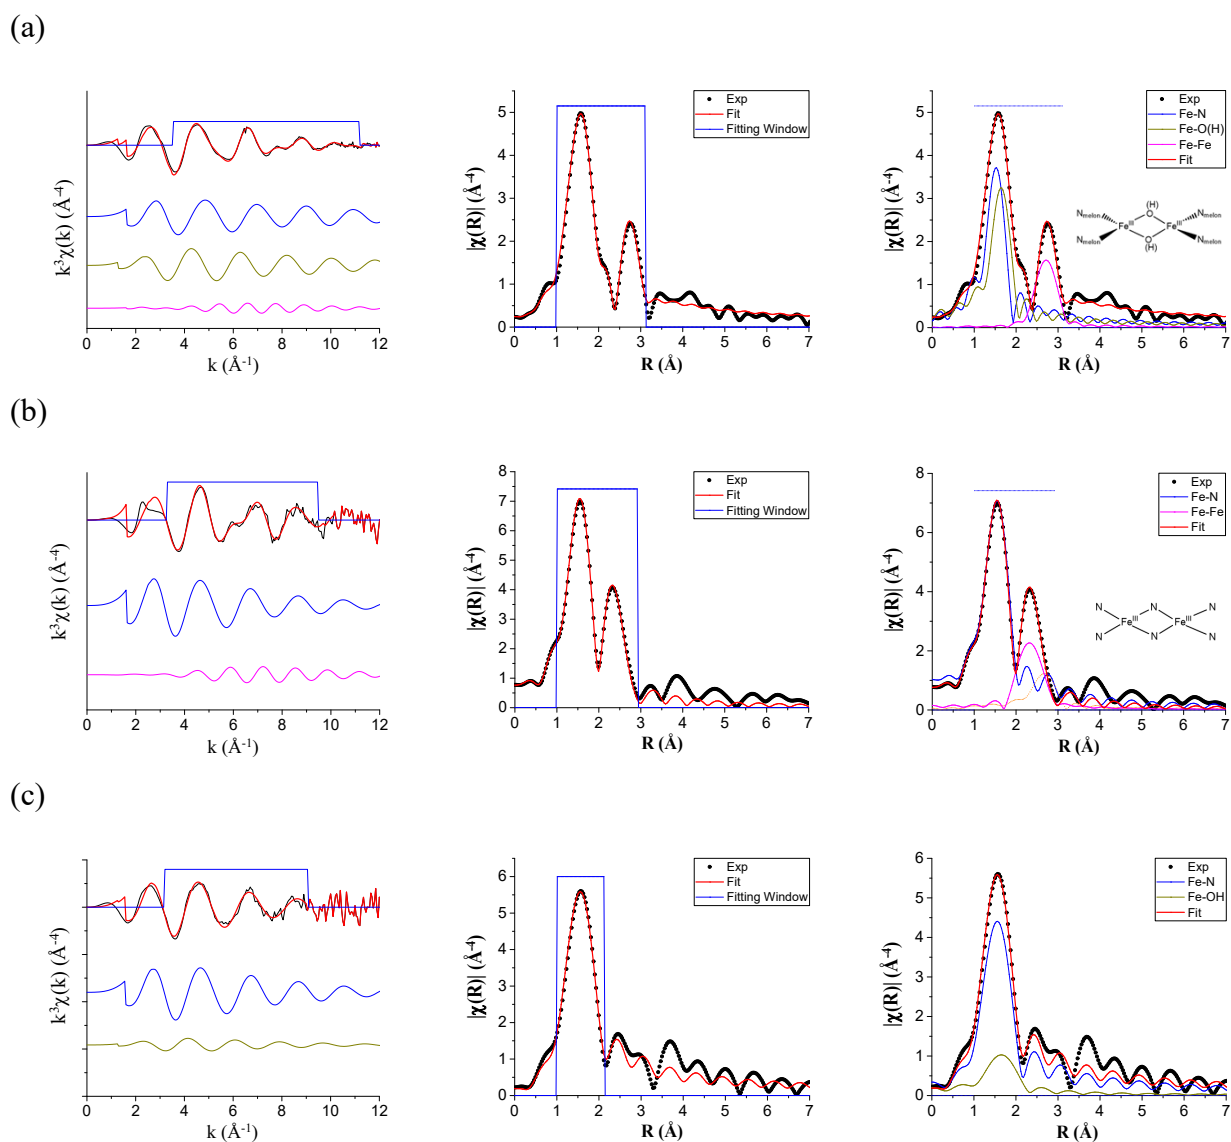

**Figure S2.** The Fe K-edge k-space and R-space EXAFS spectra of (a) Fe<sub>2</sub>/g-C<sub>3</sub>N<sub>4</sub> precursor, (b) Fe<sub>2</sub> DAC, and (c) Fe SAC. Shown are data (black) and fitting curves (red) within fitting window (blue), including the deconvoluted path contributions. The detailed EXAFS fitting results are described in Table S1.

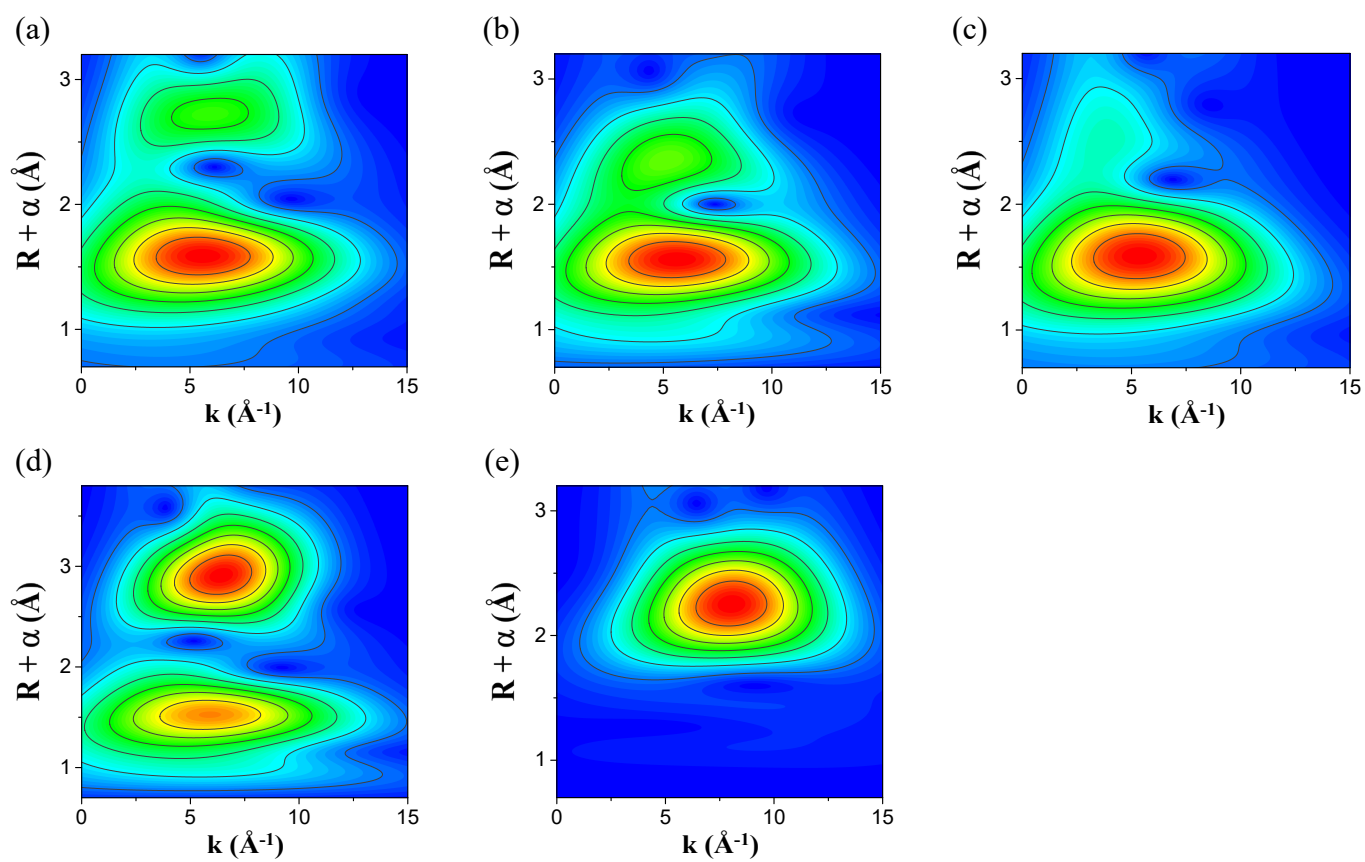

**Figure S3.** Fe K-edge WT-EXAFS contour plots for (a)  $\text{Fe}_2/\text{g-C}_3\text{N}_4$  precursor, (b)  $\text{Fe}_2$  DAC, (c) Fe SAC, (d)  $\text{Fe}_2\text{O}_3$ , and (e) Fe foil.

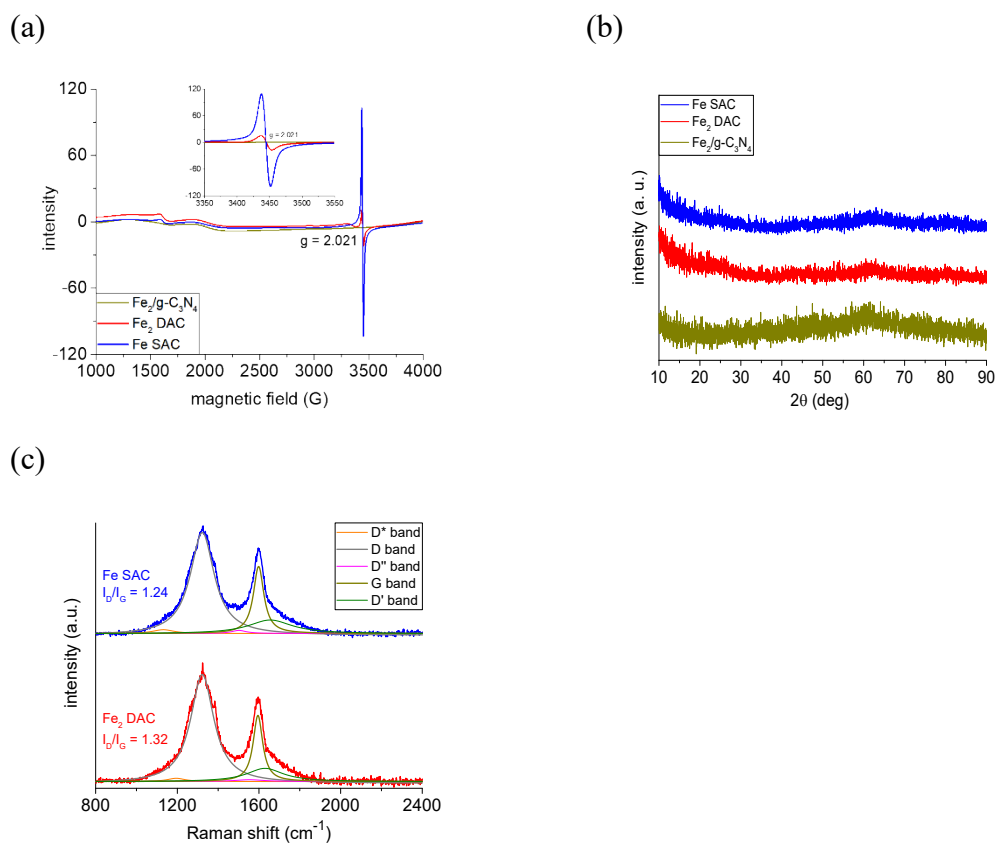

**Figure S4.** (a) 4 K EPR spectra. (b) pXRD patterns. (c) Raman spectra.<sup>1</sup>

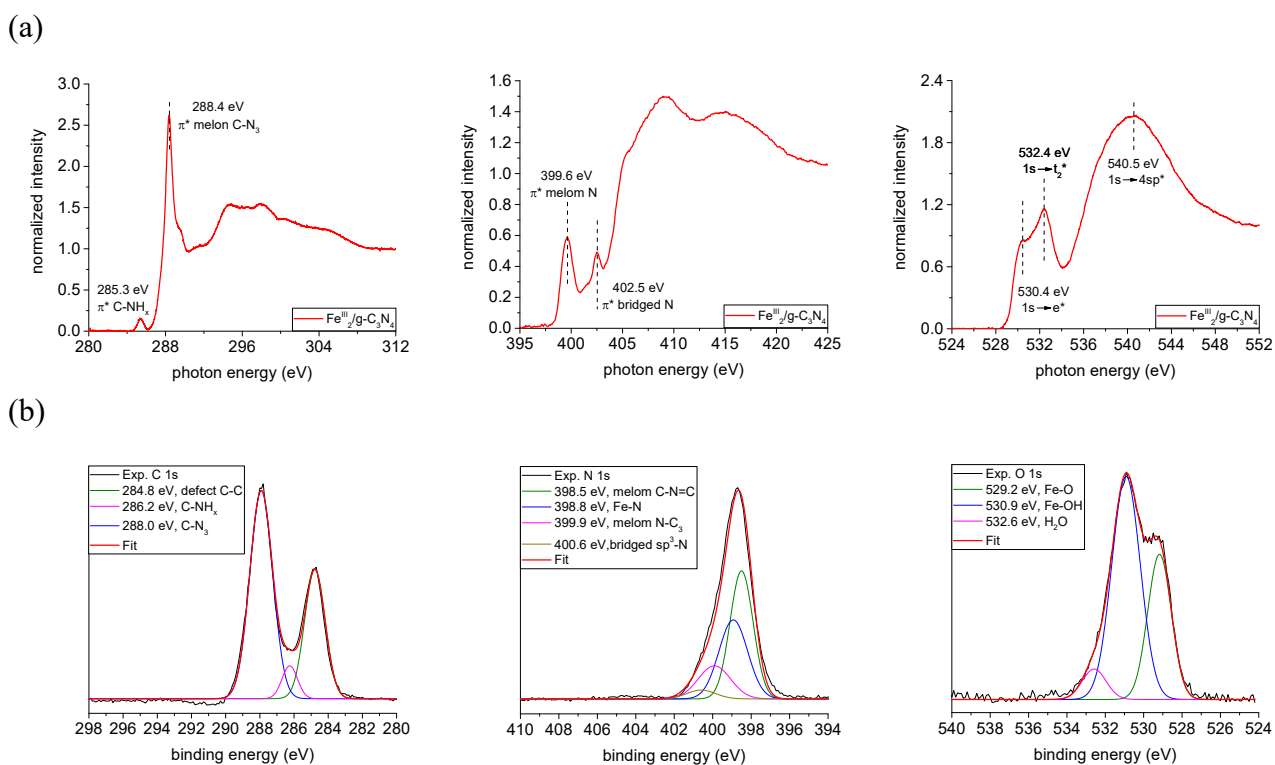

(a)

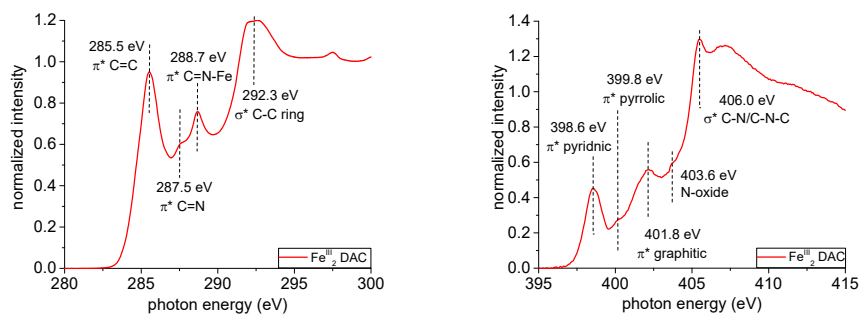

(b)

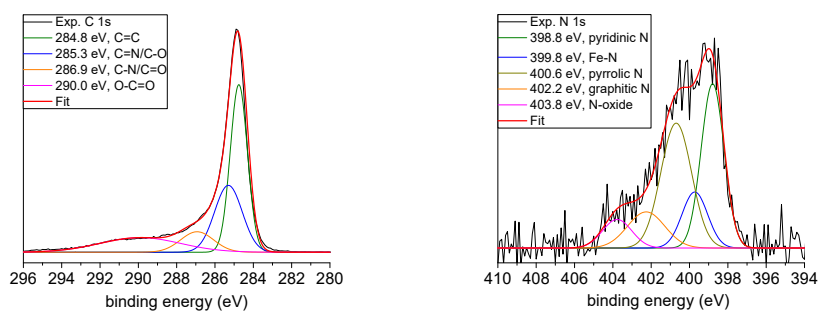

**Figure S6.** Chemical environment of  $\text{Fe}_2^{\text{II}}$  DAC catalyst as probed via (a) soft X-ray absorption spectroscopy, and (b) X-ray photoelectron spectroscopy.

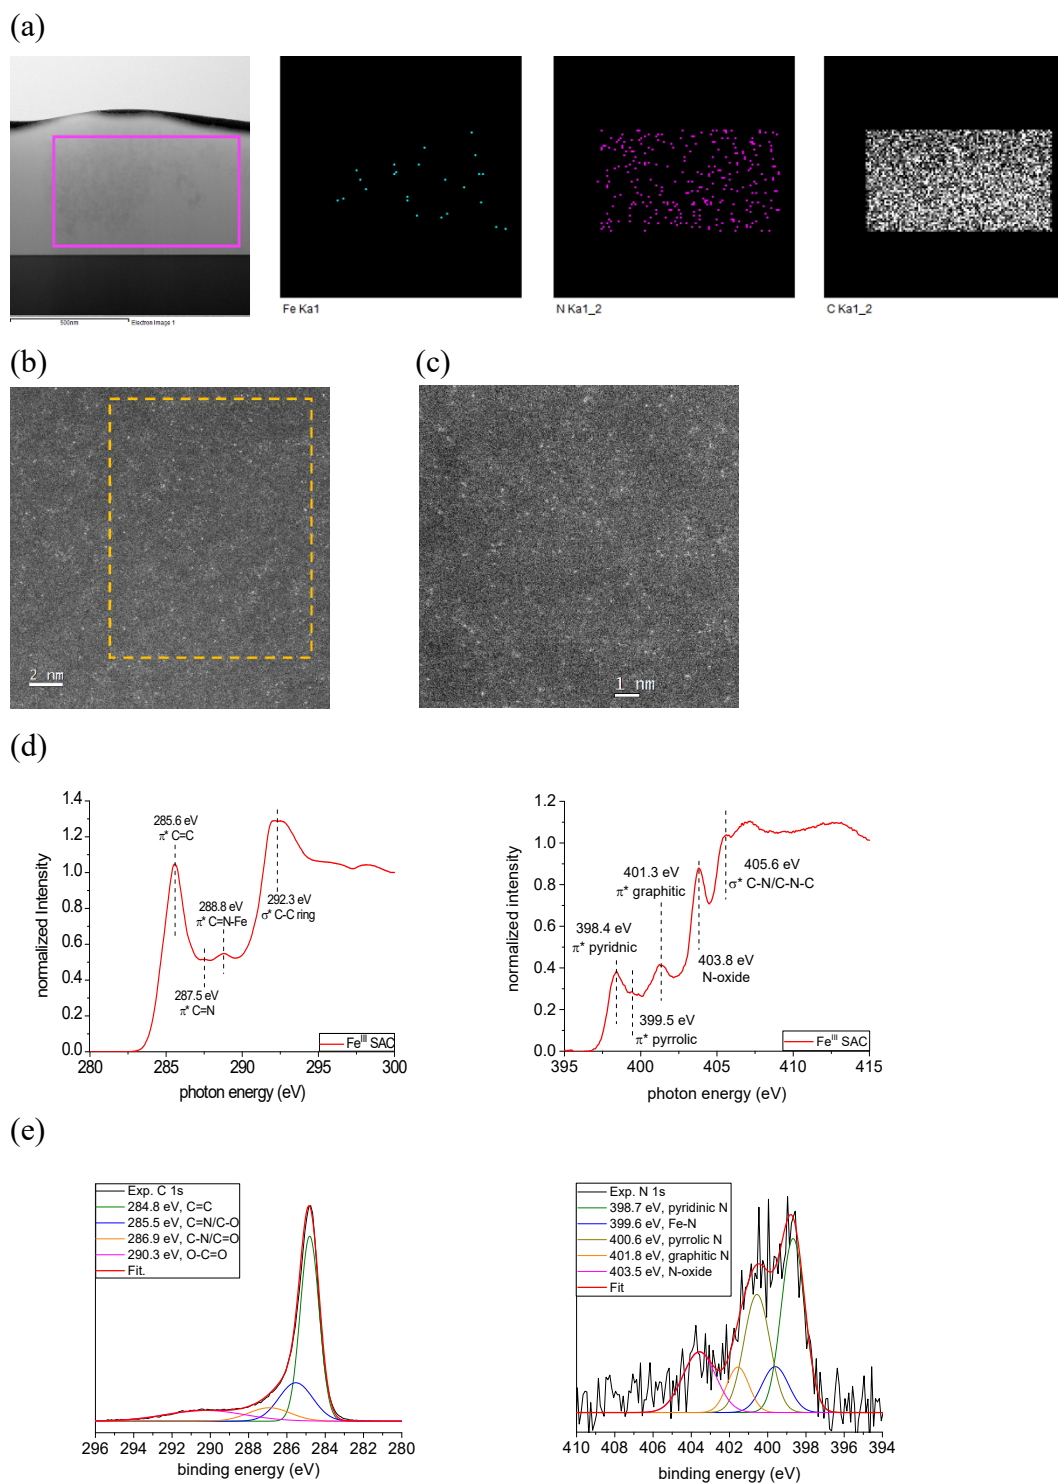

**Figure S7.** Microscopic characterization of Fe SAC. (a) HAADF-STEM image and corresponding EDX mappings, (b) AC-STEM image, and (c) magnified AC-STEM image. Chemical environment of Fe SAC as probed via (d) soft X-ray absorption spectroscopy, and (e) X-ray photoelectron spectroscopy



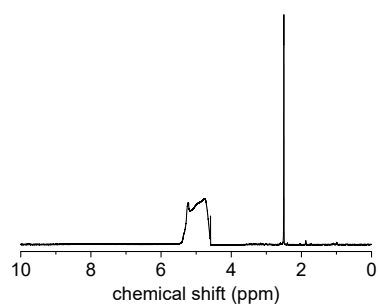

**Figure S8.**  $^1\text{H}$  NMR spectrum of liquid sample during electrocatalytic  $\text{CO}_2\text{RR}$  process in  $\text{CO}_2$ -saturated 0.5 M  $\text{KHCO}_3$  aqueous solution.

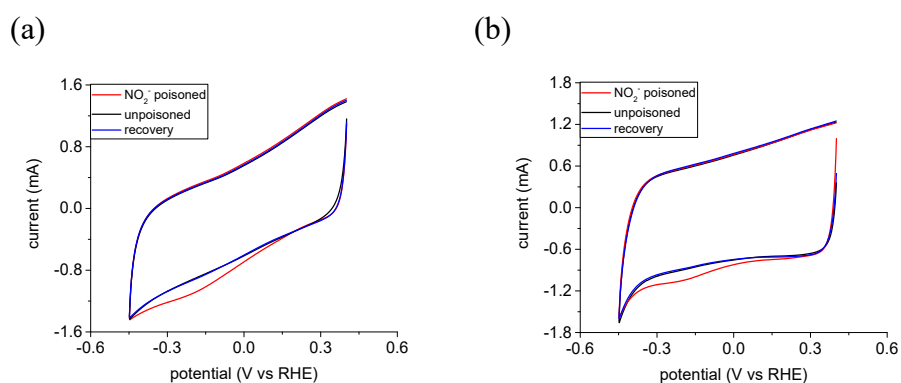

**Figure S9.** CV curves before (unpoisoned), during ( $\text{NO}_2^-$  poisoned) and after (recovery) reductive nitrite stripping experiment, used to determine the mole of iron atoms over the surface of (a)  $\text{Fe}_2\text{DAC}$  and (b)  $\text{FeSAC}$  catalytic electrodes in 0.5 M acetate buffer (pH = 5.2).

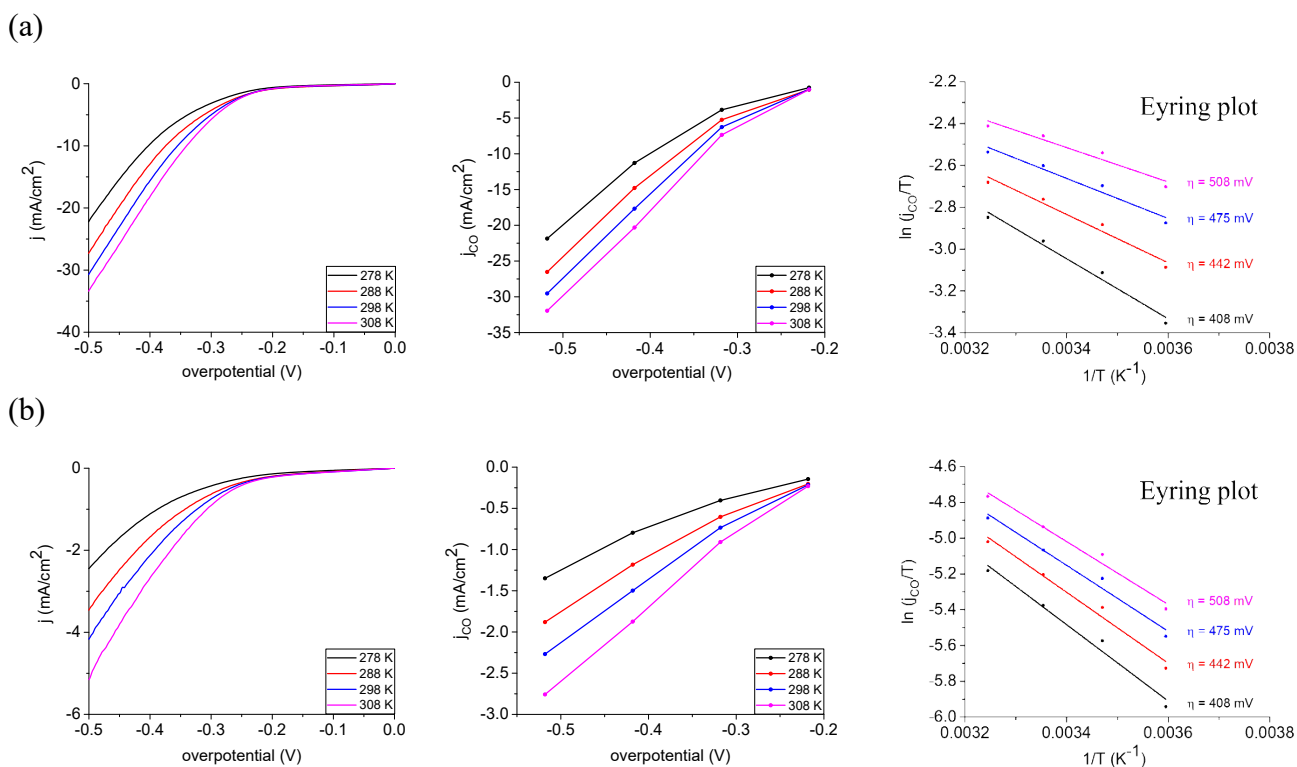

**Figure S10.** Temperature-dependent kinetic analysis of CO<sub>2</sub>RR catalysis on (a) Fe<sub>2</sub> DAC and (b) Fe SAC electrodes in CO<sub>2</sub>-saturated 0.5 M KHCO<sub>3</sub> aqueous electrolyte.

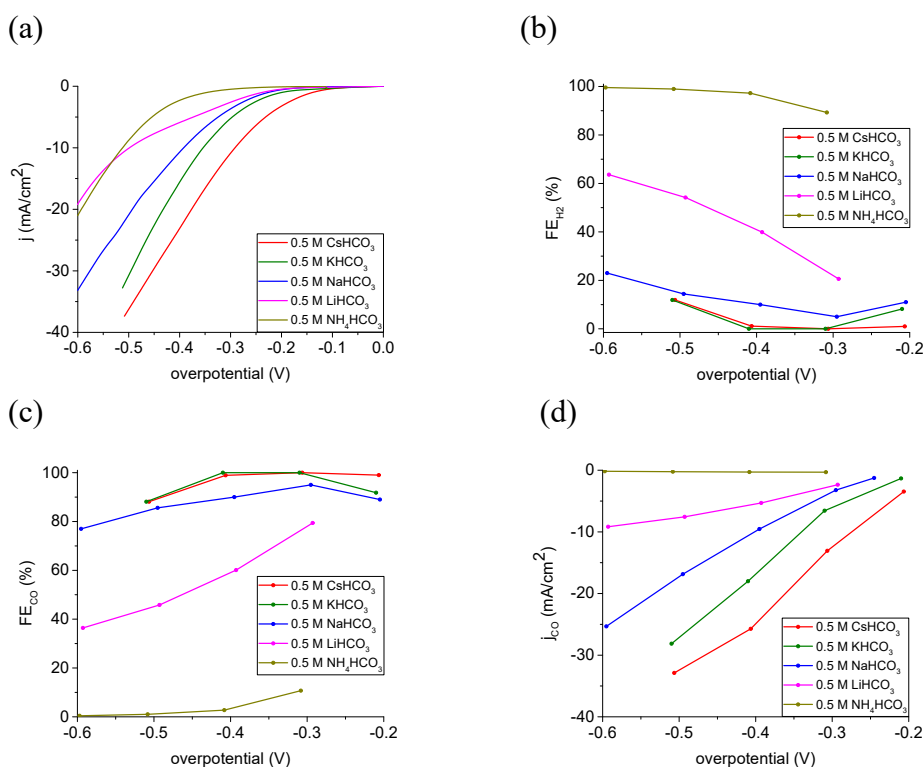

**Figure S11.** CO<sub>2</sub>RR catalytic performance. (a) The LSV curves, (b) H<sub>2</sub> Faradaic efficiency (FE<sub>H<sub>2</sub></sub>), (c) CO Faradaic efficiency (FE<sub>CO</sub>), and (d) CO partial current density of Fe<sub>2</sub> DAC electrode in CO<sub>2</sub>-saturated 0.5 M M HCO<sub>3</sub> aqueous solutions (M = NH<sub>4</sub>, Li, Na, K, Cs).

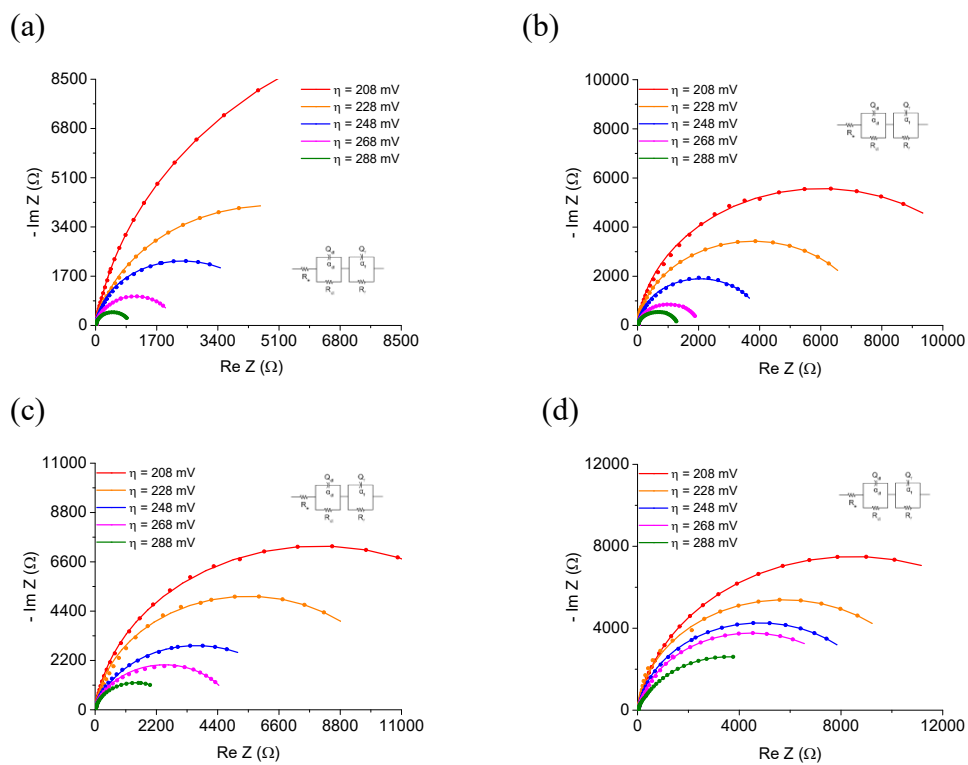

**Figure S12.** The Nyquist plots of  $\text{Fe}_2$  DAC electrode in  $\text{CO}_2$ -saturated 0.5 M (a)  $\text{CsHCO}_3$ , (b)  $\text{KHCO}_3$ , (c)  $\text{NaHCO}_3$ , and (d)  $\text{LiHCO}_3$  aqueous solutions.

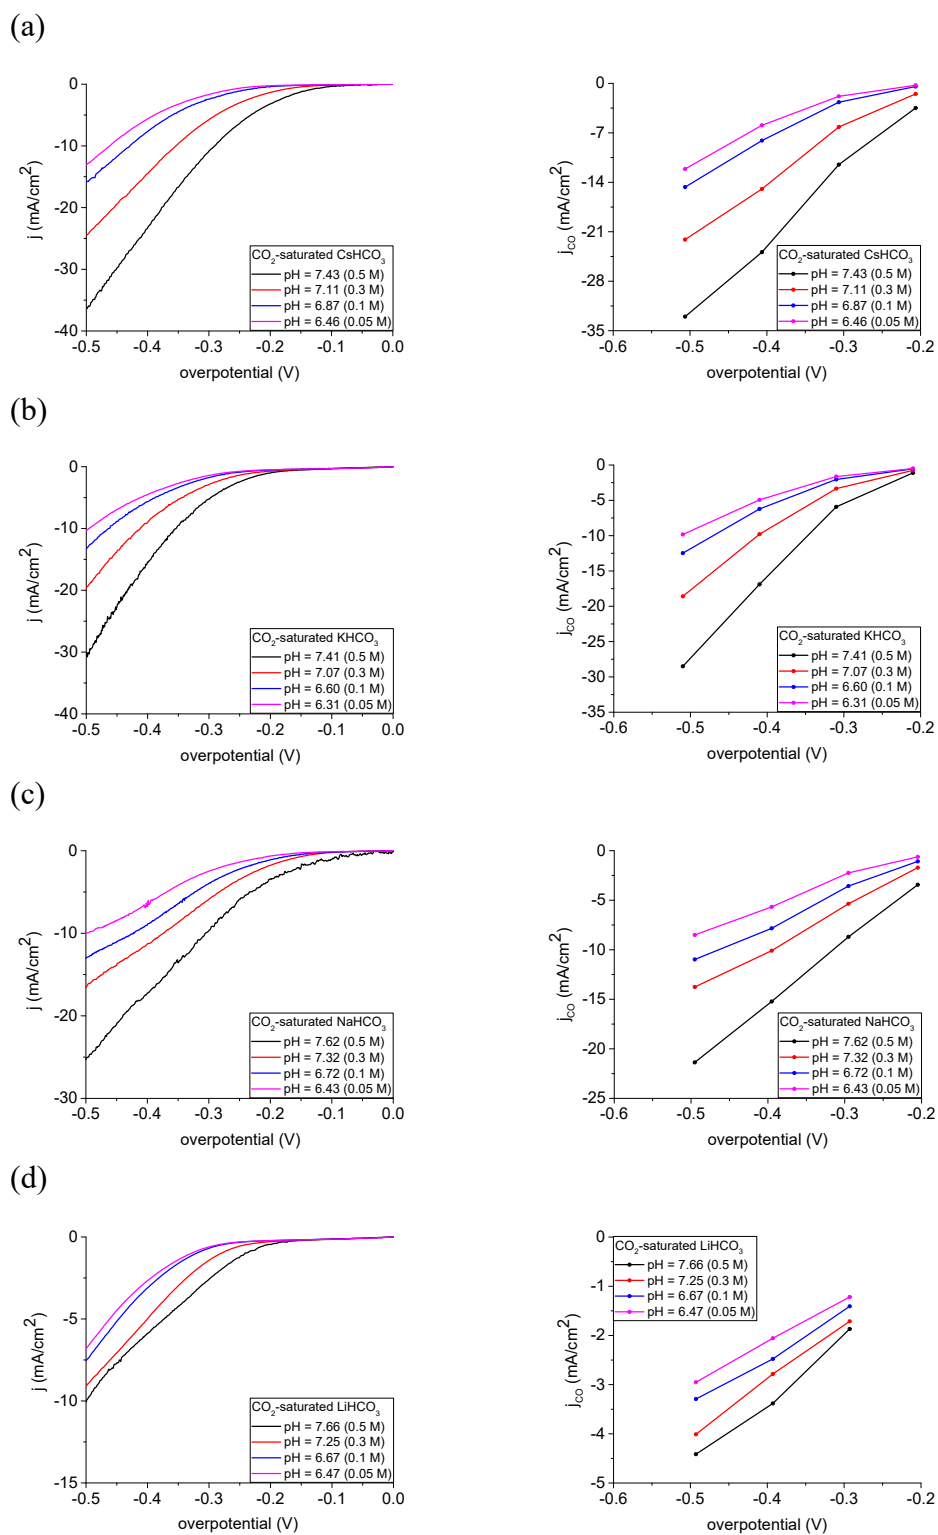

**Figure S13.** The pH-dependent CO<sub>2</sub>RR catalytic behavior of Fe<sub>2</sub> DAC electrode in CO<sub>2</sub>-saturated (a) CsHCO<sub>3</sub>, (b) KHCO<sub>3</sub>, (c) NaHCO<sub>3</sub>, and (d) LiHCO<sub>3</sub> aqueous solutions.

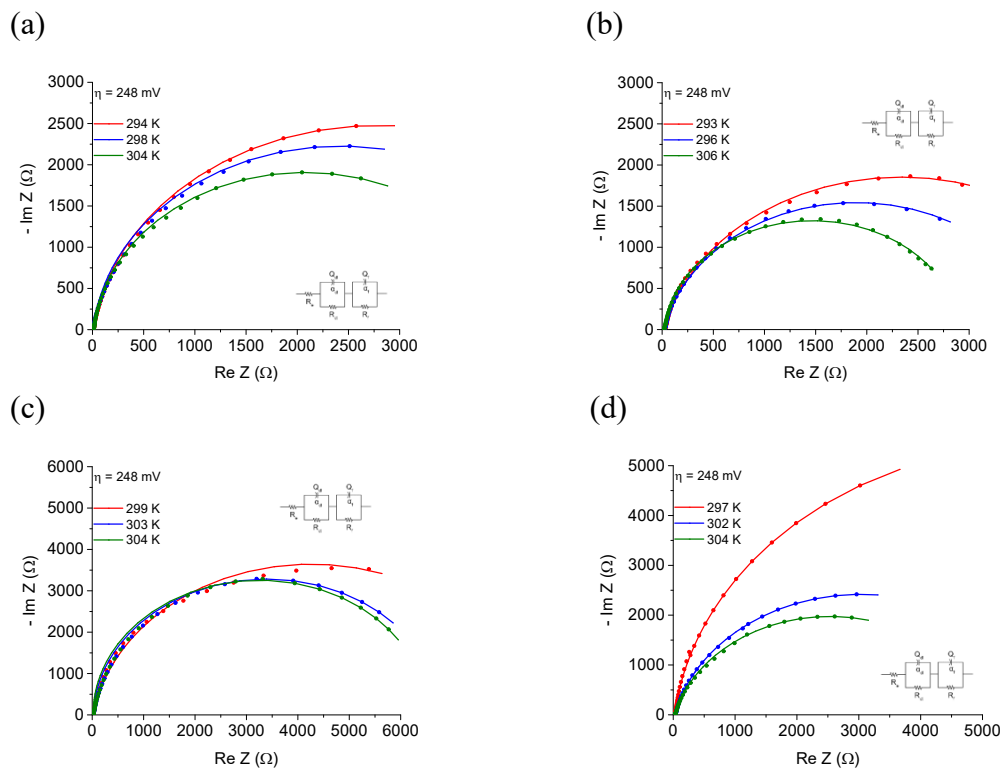

**Figure S14.** The temperature-dependent Nyquist impedance behaviors of Fe<sub>2</sub> DAC electrode at overpotential of 248 mV in CO<sub>2</sub>-saturated 0.5 M (a) CsHCO<sub>3</sub>, (b) KHCO<sub>3</sub>, (c) NaHCO<sub>3</sub>, and (d) LiHCO<sub>3</sub> aqueous solutions.

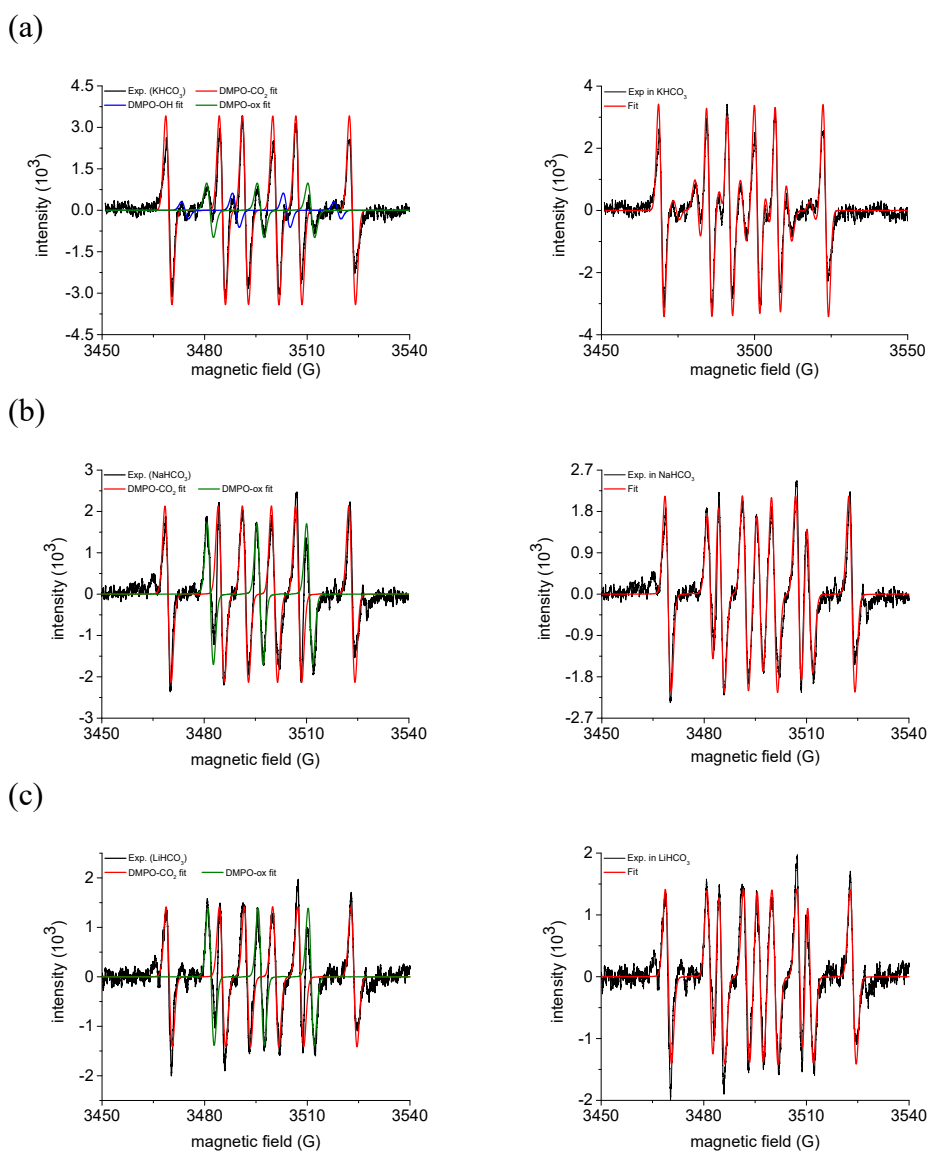

**Figure S15.** Deconvolution of EPR signal formed in  $\text{CO}_2$ -saturated 0.1 M (a)  $\text{KHCO}_3$ , (b)  $\text{NaHCO}_3$ , (c)  $\text{LiHCO}_3$  aqueous solutions, including  $\text{DMPO-CO}_2$  ( $g = 2.0065$ ,  $a_N = 15.6$  G,  $a_H = 18.9$  G),  $\text{DMPO-OH}$  ( $g = 2.0065$ ,  $a_N = 15.1$  G,  $a_H = 15.1$  G) and  $\text{DMPO-oxidized}$  ( $g = 2.0065$ ,  $a_N = 14.9$  G).

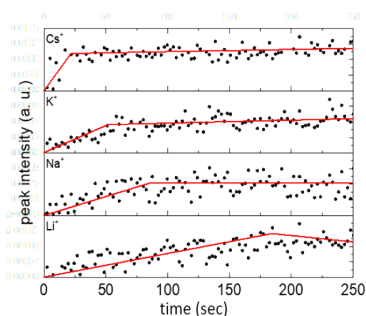

**Figure S16.** The change in peak intensity of  $[\text{*COOM}]^-$  ( $M = \text{Li, Na, K, Cs}$ ) intermediate during *operando* ATR-SEIRAS measurements at overpotential of 400 mV.

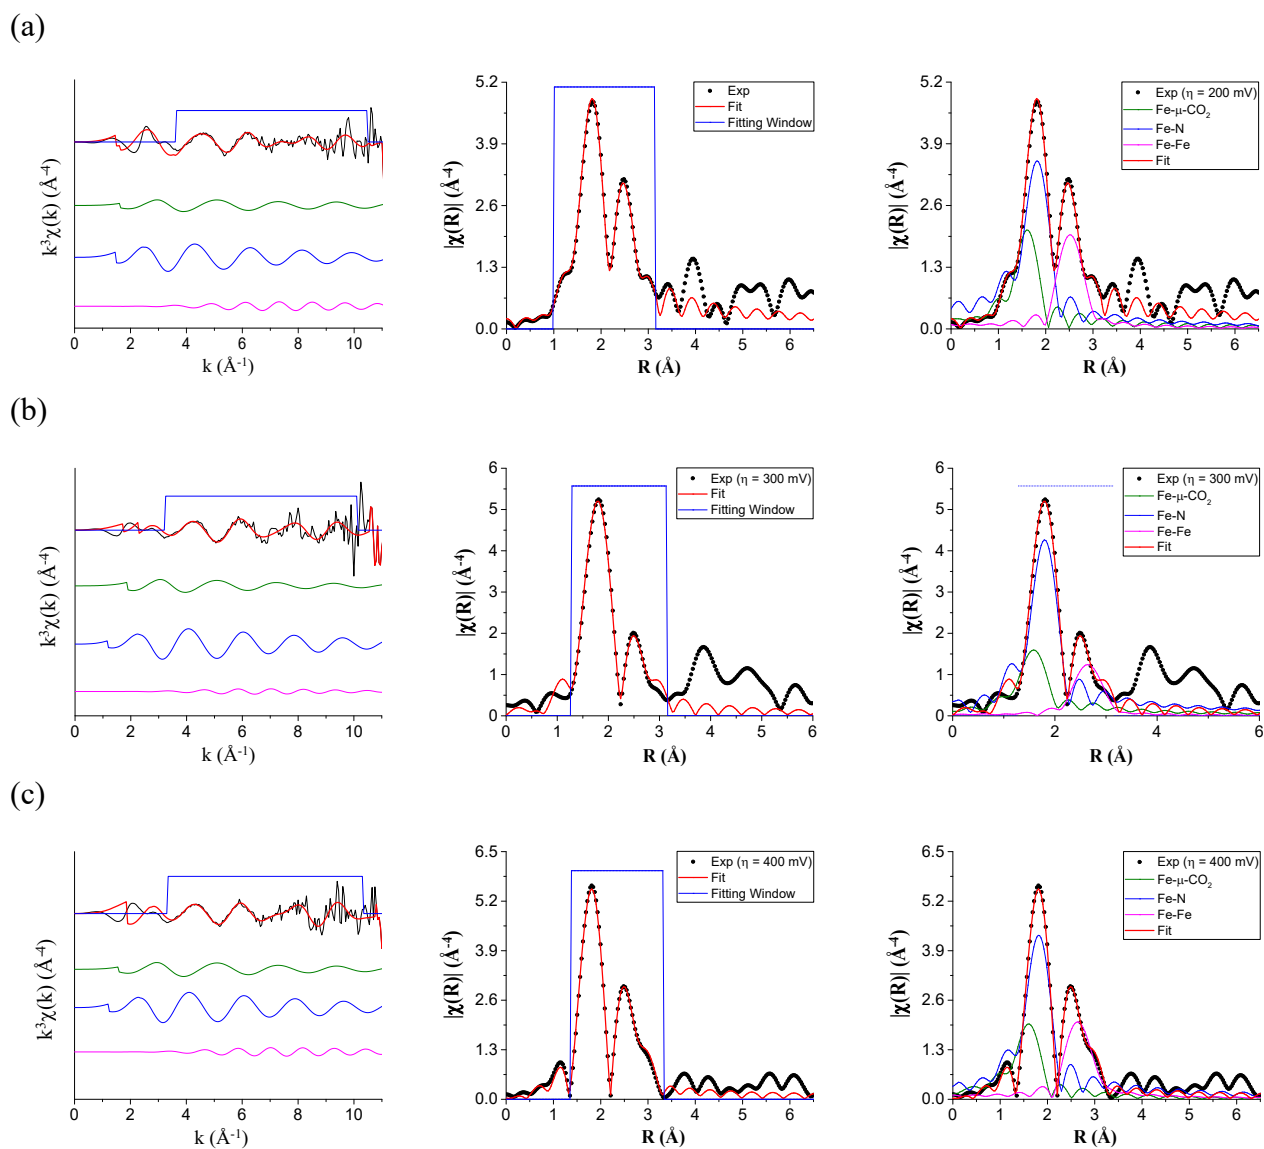

**Figure S17.** Operando Fe K edge k-space and R-space EXAFS spectra of Fe<sub>2</sub> DAC electrode under CO<sub>2</sub>RR condition at overpotential of (a) 200 mV, (b) 300 mV, and (c) 400 mV in CO<sub>2</sub>-saturated 0.1 M KHCO<sub>3</sub> aqueous solution. Shown are data (black) and fitting curves (red) within fitting window (blue), including the deconvoluted path contributions. The detailed EXAFS fitting results are described in Table S2.

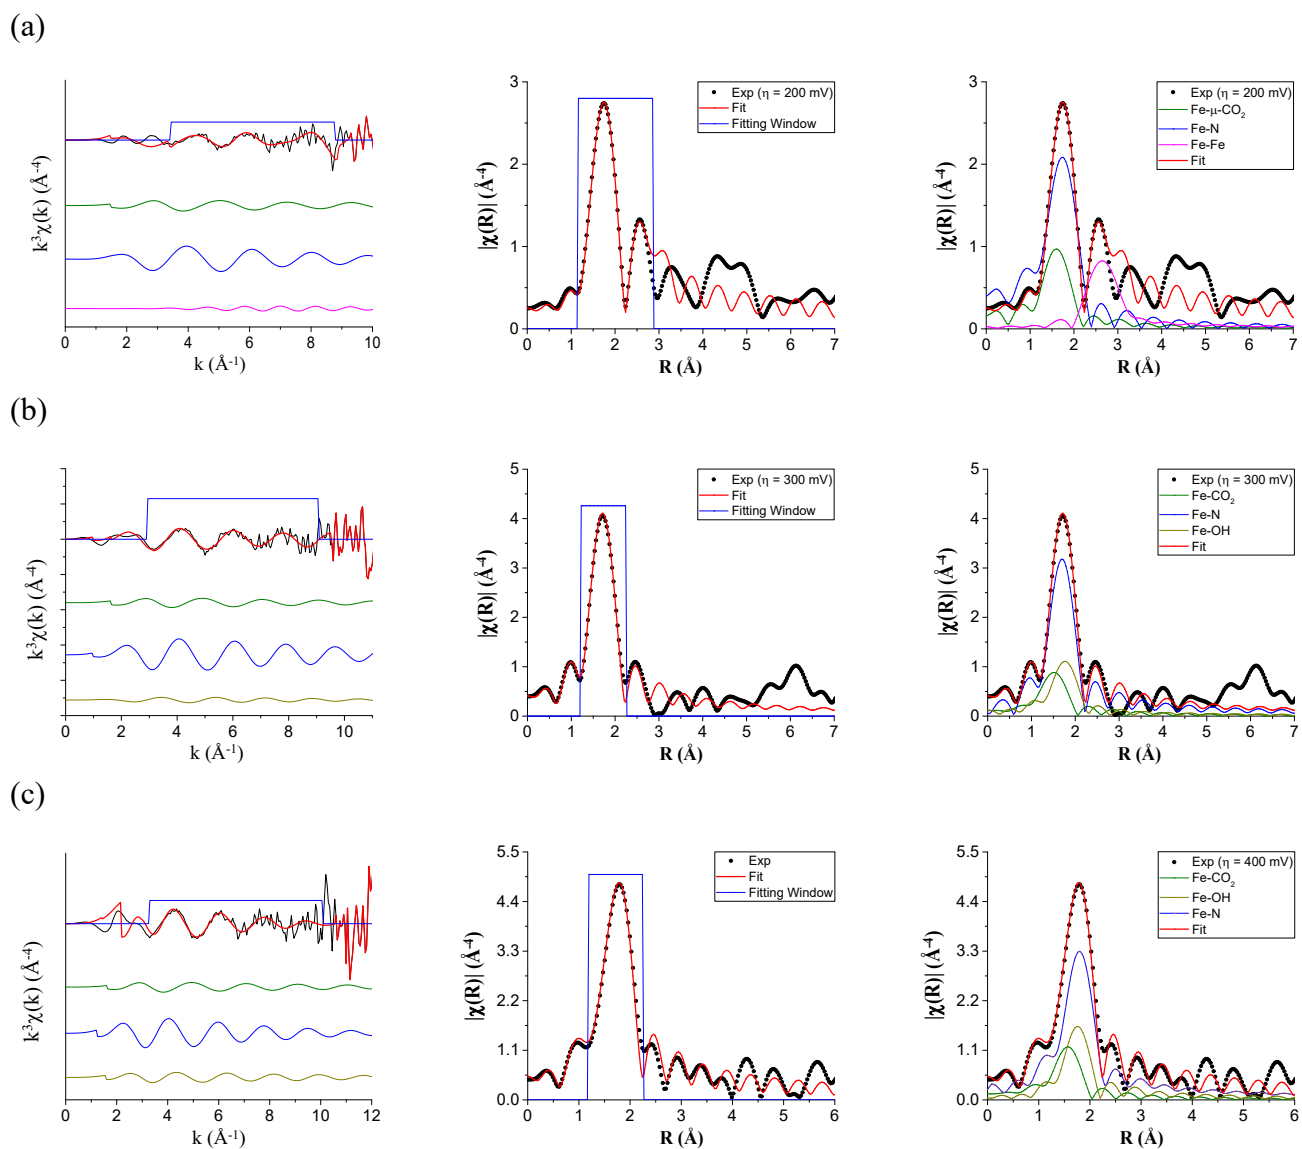

**Figure S18.** Operando Fe K edge k-space and R-space EXAFS spectra of Fe<sub>2</sub> DAC electrode under CO<sub>2</sub>RR condition at overpotential of (a) 200 mV, (b) 300 mV, and (c) 400 mV in CO<sub>2</sub>-saturated 0.1 M LiHCO<sub>3</sub> aqueous solution. Shown are data (black) and fitting curves (red) within fitting window (blue), including the deconvoluted path contributions. The detailed EXAFS fitting results are described in Table S3.



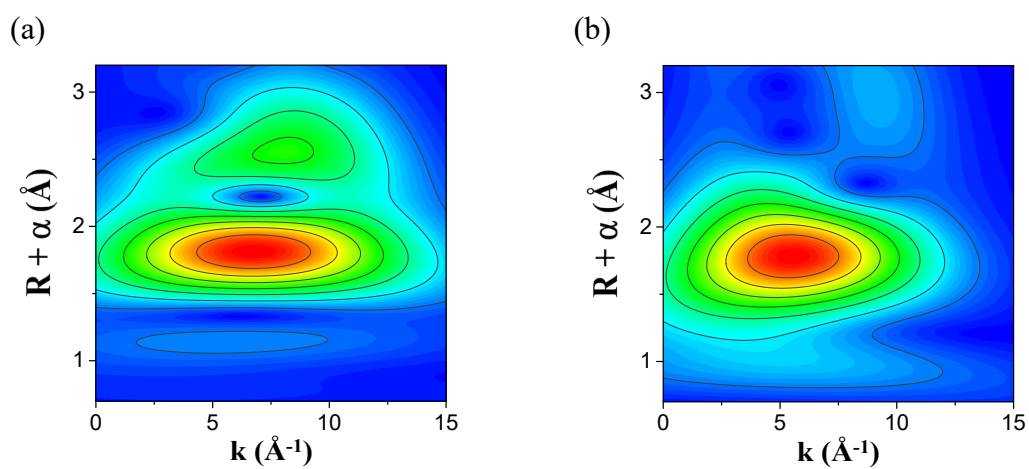

**Figure S19.** Fe K-edge WT-EXAFS contour plots of Fe<sub>2</sub> DAC electrode in CO<sub>2</sub>-saturated (a) 0.1 M KHCO<sub>3</sub> and (b) 0.1 M LiHCO<sub>3</sub> solution at overpotential of 400 mV.

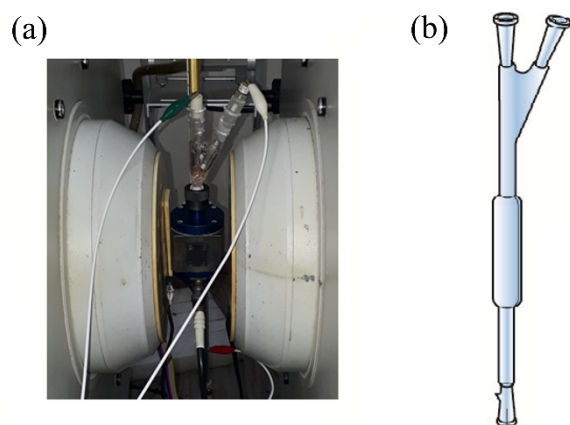

**Figure S20.** (a) In operando EPR measurement setup and (b) image of the Suprasil flat quartz cell.

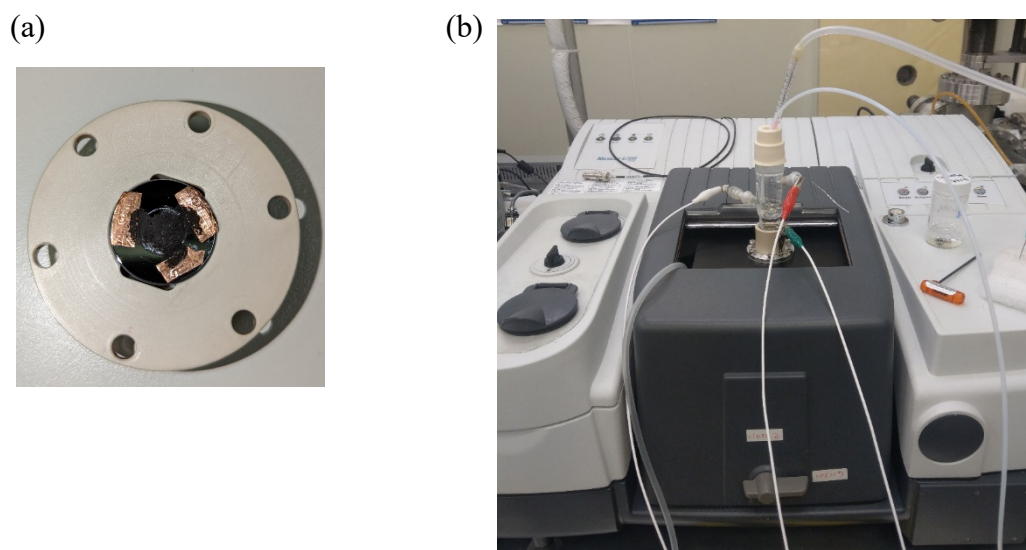

**Figure S21.** (a) Fe<sub>2</sub> DAC catalyst deposited on the fresh surface (Si prism) with three small pieces of conductive copper tapes and (b) In operando ATR-SEIRAS measurement setup.

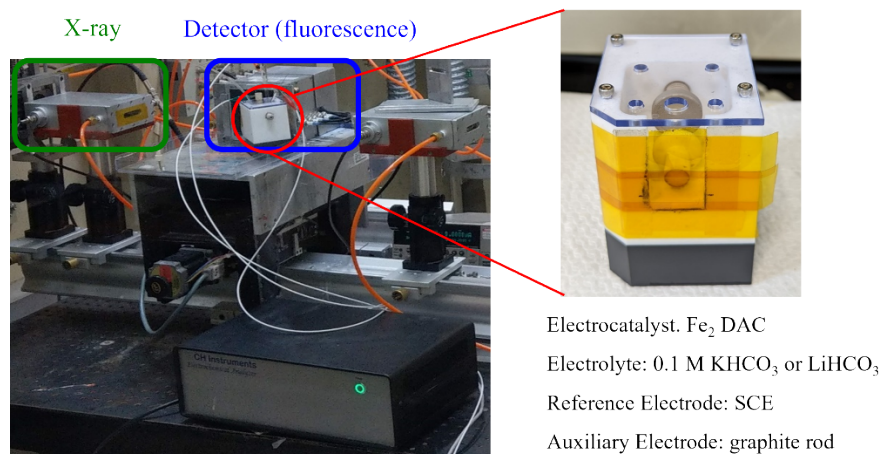

**Figure S22.** (a) In operando Fe K-edge XAS measurement setup and the customized operando electrochemical cell.

**Table S1.** Multi-path EXAFS fitting results for Fe<sub>2</sub>/g-C<sub>3</sub>N<sub>4</sub>, Fe<sub>2</sub> DAC and Fe SAC material models. Amplitude reduction factor (S<sub>0</sub><sup>2</sup>) was fixed at 0.9.

| material models |                                                    | Fe <sub>2</sub> /g-C <sub>3</sub> N <sub>4</sub> | Fe <sub>2</sub> DAC | Fe SAC  |
|-----------------|----------------------------------------------------|--------------------------------------------------|---------------------|---------|
| Fe-N<br>path    | C.N.                                               | 2.23                                             | 4.47                | 4.48    |
|                 | R (Å)                                              | 1.91                                             | 1.98                | 1.98    |
|                 | ΔE <sub>0</sub> (eV)                               | 9.924                                            | 9.971               | 9.659   |
|                 | σ <sup>2</sup> (10 <sup>-3</sup> ×Å <sup>2</sup> ) | 3.25                                             | 7.73                | 7.04    |
| Fe-Fe<br>path   | C.N.                                               | 1.12                                             | 1.19                | /       |
|                 | R (Å)                                              | 3.01                                             | 2.71                |         |
|                 | ΔE <sub>0</sub> (eV)                               | 9.889                                            | 0.717               |         |
|                 | σ <sup>2</sup> (10 <sup>-3</sup> ×Å <sup>2</sup> ) | 9.85                                             | 7.77                |         |
| Fe-O(H)<br>path | C. N.                                              | 2.30                                             | /                   | 1.18    |
|                 | R (Å)                                              | 2.03                                             |                     | 2.09    |
|                 | ΔE <sub>0</sub> (eV)                               | 5.928                                            |                     | 6.400   |
|                 | σ <sup>2</sup> (10 <sup>-3</sup> ×Å <sup>2</sup> ) | 4.13                                             |                     | 7.71    |
| R factor        |                                                    | 0.00382                                          | 0.00498             | 0.00081 |

**Table S2.** Multi-path EXAFS fitting results for Fe<sub>2</sub> DAC electrode under CO<sub>2</sub>RR operational condition at overpotentials from 200 to 400 mV in CO<sub>2</sub>-saturated 0.1 M KHCO<sub>3</sub> aqueous electrolyte. Amplitude reduction factor ( $S_0^2$ ) was fixed at 0.9.

| overpotentials             |                                          | 200 mV  | 300 mV  | 400 mV  |
|----------------------------|------------------------------------------|---------|---------|---------|
| Fe-CO <sub>2</sub><br>path | C.N.                                     | 1.19    | 1.14    | 1.18    |
|                            | R (Å)                                    | 1.85    | 1.86    | 1.85    |
|                            | $\Delta E_0$ (eV)                        | 9.975   | 9.977   | 9.705   |
|                            | $\sigma^2$ ( $10^{-3}\times\text{Å}^2$ ) | 3.01    | 4.97    | 4.74    |
| Fe-N<br>path               | C.N.                                     | 4.03    | 4.21    | 4.05    |
|                            | R (Å)                                    | 2.08    | 2.13    | 2.13    |
|                            | $\Delta E_0$ (eV)                        | 7.873   | 3.650   | 5.783   |
|                            | $\sigma^2$ ( $10^{-3}\times\text{Å}^2$ ) | 5.10    | 5.11    | 5.14    |
| Fe-Fe<br>path              | C. N.                                    | 1.16    | 1.11    | 1.13    |
|                            | R (Å)                                    | 3.04    | 3.14    | 3.14    |
|                            | $\Delta E_0$ (eV)                        | -9.589  | -9.988  | -9.988  |
|                            | $\sigma^2$ ( $10^{-3}\times\text{Å}^2$ ) | 5.17    | 9.97    | 5.60    |
| R factor                   |                                          | 0.00438 | 0.00759 | 0.00509 |

**Table S3.** Multi-path EXAFS fitting results for Fe<sub>2</sub> DAC electrode under CO<sub>2</sub>RR operational condition at overpotentials from 200 to 400 mV in CO<sub>2</sub>-saturated 0.1 M LiHCO<sub>3</sub> aqueous electrolyte. Amplitude reduction factor ( $S_0^2$ ) was fixed at 0.9.

| overpotentials             |                                            | 200 mV  | 300 mV  | 400 mV  |
|----------------------------|--------------------------------------------|---------|---------|---------|
| Fe-CO <sub>2</sub><br>path | C.N.                                       | 0.83    | 0.77    | 0.61    |
|                            | R (Å)                                      | 1.88    | 1.90    | 1.91    |
|                            | $\Delta E_0$ (eV)                          | 7.892   | 9.934   | 9.861   |
|                            | $\sigma^2$ ( $10^{-3} \times \text{Å}^2$ ) | 3.01    | 3.83    | 3.03    |
| Fe-N<br>path               | C.N.                                       | 4.42    | 4.48    | 4.44    |
|                            | R (Å)                                      | 2.07    | 2.12    | 2.15    |
|                            | $\Delta E_0$ (eV)                          | -5.041  | 3.457   | 6.298   |
|                            | $\sigma^2$ ( $10^{-3} \times \text{Å}^2$ ) | 7.39    | 4.43    | 8.00    |
| Fe-Fe<br>path              | C. N.                                      | 0.76    | /       | /       |
|                            | R (Å)                                      | 3.15    |         |         |
|                            | $\Delta E_0$ (eV)                          | -9.957  |         |         |
|                            | $\sigma^2$ ( $10^{-3} \times \text{Å}^2$ ) | 7.42    |         |         |
| Fe-O(H)<br>path            | C. N.                                      | /       | 1.08    | 1.11    |
|                            | R (Å)                                      |         | 2.05    | 2.07    |
|                            | $\Delta E_0$ (eV)                          |         | -5.664  | 9.948   |
|                            | $\sigma^2$ ( $10^{-3} \times \text{Å}^2$ ) |         | 6.06    | 3.64    |
| R factor                   |                                            | 0.00815 | 0.00551 | 0.00624 |

## Reference

1 A. Y. Lee, K. Yang, N. D. Anh, C. Park, S. M. Lee, T. G. Lee and M. S. Jeong, *Appl. Surf. Sci.*, 2021, **536**, 147990.
